# Supplementary material
Source: publisher figshare collection journal article supplement (https://acs.figshare.com/ndownloader/files/6488811)
Supplement: Supplementary file 1 [file 6488811]

1 **Supplemental Information**

2

3 **Table S1 – Site Information and arranged by region and distance from Rim Fire Origin**

| Station Name              | Site Dates       | Agency   | Method | Distance from Rim Fire (KM) | Pearson Coefficient <sup>a</sup> |
|---------------------------|------------------|----------|--------|-----------------------------|----------------------------------|
| <i>Central Sierra</i>     |                  |          |        |                             |                                  |
| Rim Fire Camp (RFC)       | Aug 31 – Sept 19 | USDA FS  | EBAM   | 7                           | 0.83                             |
| Groveland (GL)            | Aug 22 – Oct 31  | USDA FS  | EBAM   | 11                          | 0.61                             |
| Tuolumne City (TC)        | Aug 23 – Sep 22  | CARB OER | EBAM   | 18                          | 0.57                             |
| Jamestown (JT)            | Sep 14 – Sep 23  | CARB OER | EBAM   | 31                          | 0.55                             |
| La Grange (LG)            | Aug 24 – Sep 12  | CARB OER | EBAM   | 31                          | 0.23                             |
| Yosemite Valley (YV)      | Sept 6 – Oct 17  | CARB OER | EBAM   | 46                          | 0.70                             |
| Bootjack (BO)             | Aug 2 – Oct 17   | CARB OER | EBAM   | 50                          | -0.09                            |
| Tuolumne Meadows (TM)     | Aug 1 – Sept 20  | CARB OER | EBAM   | 64                          | 0.23                             |
| <i>San Joaquin Valley</i> |                  |          |        |                             |                                  |
| Merced (MC)               | Permanent Site   | CARB     | BAM    | 71                          | -0.17                            |
| Clovis (CV)               | Permanent Site   | CARB     | BAM    | 120                         | 0.20                             |
| Fresno (FR)               | Permanent Site   | CARB     | BAM    | 122                         | 0.31                             |
| Tranquility (TQ)          | Permanent Site   | CARB     | BAM    | 138                         | -0.23                            |
| <i>Eastern Sierra</i>     |                  |          |        |                             |                                  |
| Devils Postpile (DP)      | Aug 17 – Sept 7  | USDA FS  | EBAM   | 92                          | 0.06                             |
| <i>Northern Sierra</i>    |                  |          |        |                             |                                  |
| Pollock Pines (PP)        | Aug 22 – Sept 17 | CARB OER | EBAM   | 110                         | 0.51                             |
| South Lake Tahoe (SLT)    | Aug 28 – Sept 18 | CARB OER | EBAM   | 117                         | 0.72                             |
| Wentworth (WW)            | Aug 17 – Sep 9/8 | CARB OER | EBAM   | 134                         | 0.32                             |
| Cool (CO)                 | Aug 17 – 10/17   | CARB OER | EBAM   | 140                         | 0.63                             |
| <i>Nevada</i>             |                  |          |        |                             |                                  |
| Gardnerville (GV)         | Permanent Site   | NBAQP    | BAM    | 120                         | 0.51                             |
| Carson City (CC)          | Permanent Site   | NBAQP    | BAM    | 146                         | 0.45                             |
| Reno (RO)                 | Permanent Site   | WAQMD    | BAM    | 187                         | 0.48                             |
| Reno Galletti (RG)        | Permanent Site   | WAQMD    | BAM    | 188                         | 0.48                             |
| Sparks (SP)               | Permanent Site   | WAQMD    | BAM    | 189                         | 0.60                             |

4 a. Pearson coefficients between BlueSky concentration estimates and measured PM<sub>2.5</sub>

5 concentrations

6

7 **Table S2. Major Fuel Characteristic Classification System (FCCS) fuel types in the Rim**  
8 **Fire perimeter, area estimated to burn, % of total area, fuel loading and PM2.5 emissions**  
9 **per hectare.**

| FCCS Fuel Type                                                              | Area (ha) | % Area | Fuel Loading (tonnes/ha) | PM2.5 emitted (tonnes/ha) |
|-----------------------------------------------------------------------------|-----------|--------|--------------------------|---------------------------|
| Douglas-fir - Sugar pine - Tanoak forest                                    | 35,975    | 33.5   | 155                      | 1.27                      |
| Black oak woodland                                                          | 9,496     | 8.09   | 64                       | 0.24                      |
| Jeffrey pine - Red fir - White fir / Greenleaf manzanita - Snowbrush forest | 17,055    | 15.9   | 203                      | 2.70                      |
| Jeffrey pine - Ponderosa pine - Douglas-fir - Black oak forest              | 23,234    | 21.7   | 74                       | 0.45                      |
| Red fir forest                                                              | 13,549    | 12.6   | 207                      | 2.60                      |
| Live oak - Blue oak woodland                                                | 6,912     | 0.20   | 45                       | 0.19                      |

10

Figure S1 – Map of study area, fire locations and monitoring locations

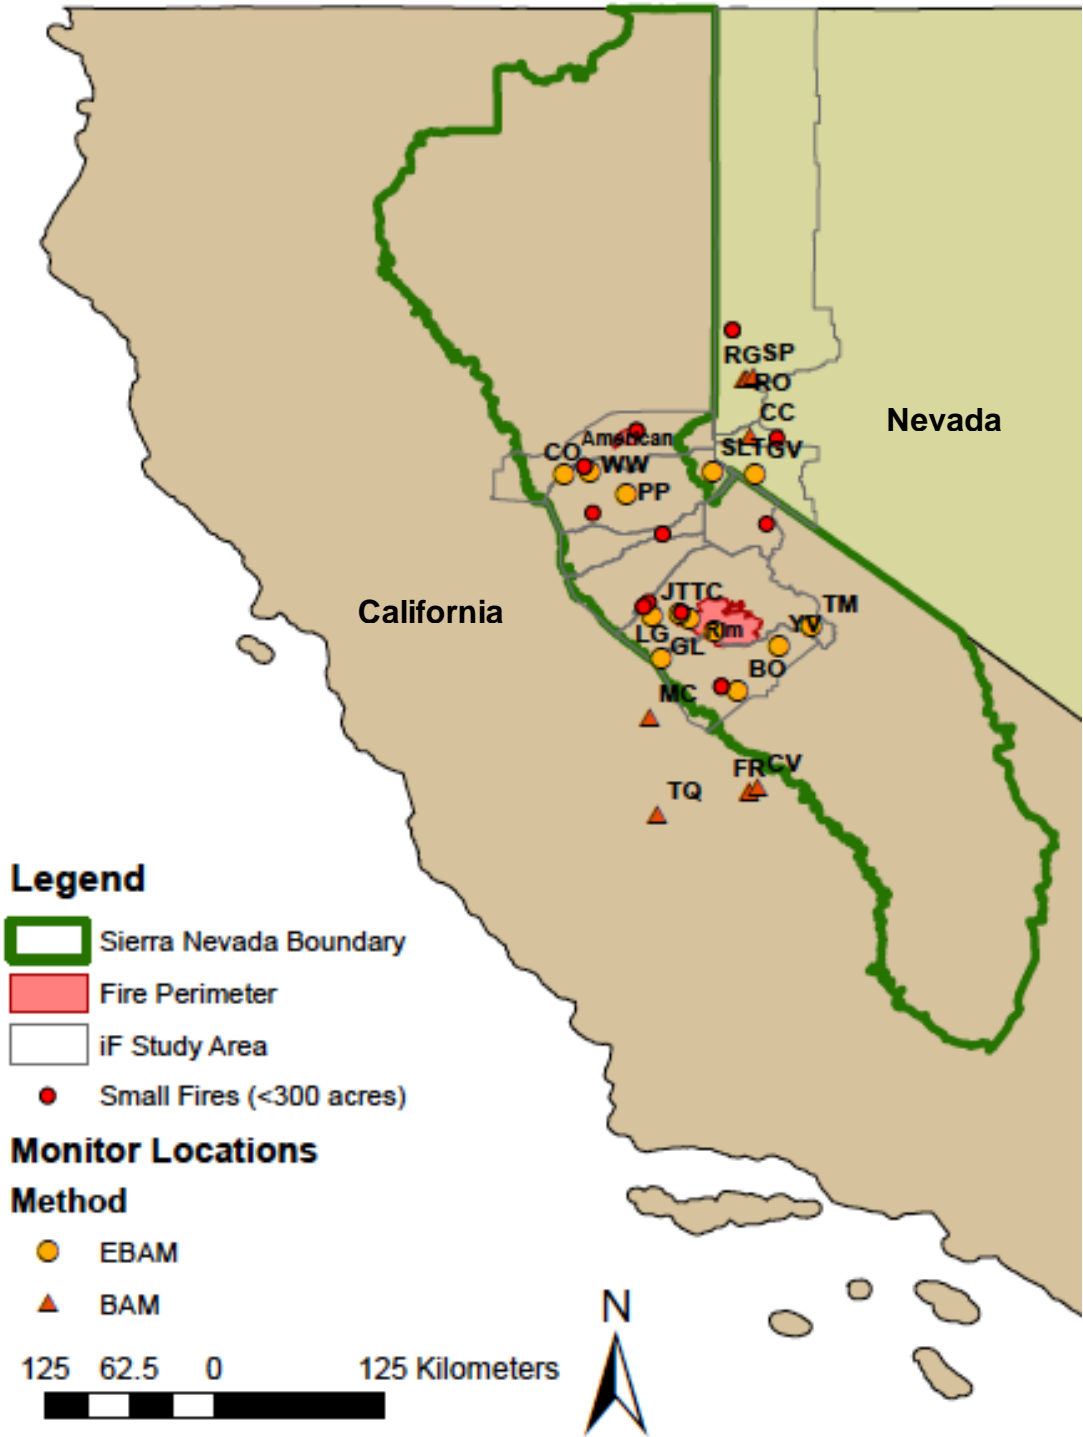

**Figure S2: Actual and simulated cumulative area growth of the Rim fire from 8/17/2013 – 9/16/2013.**

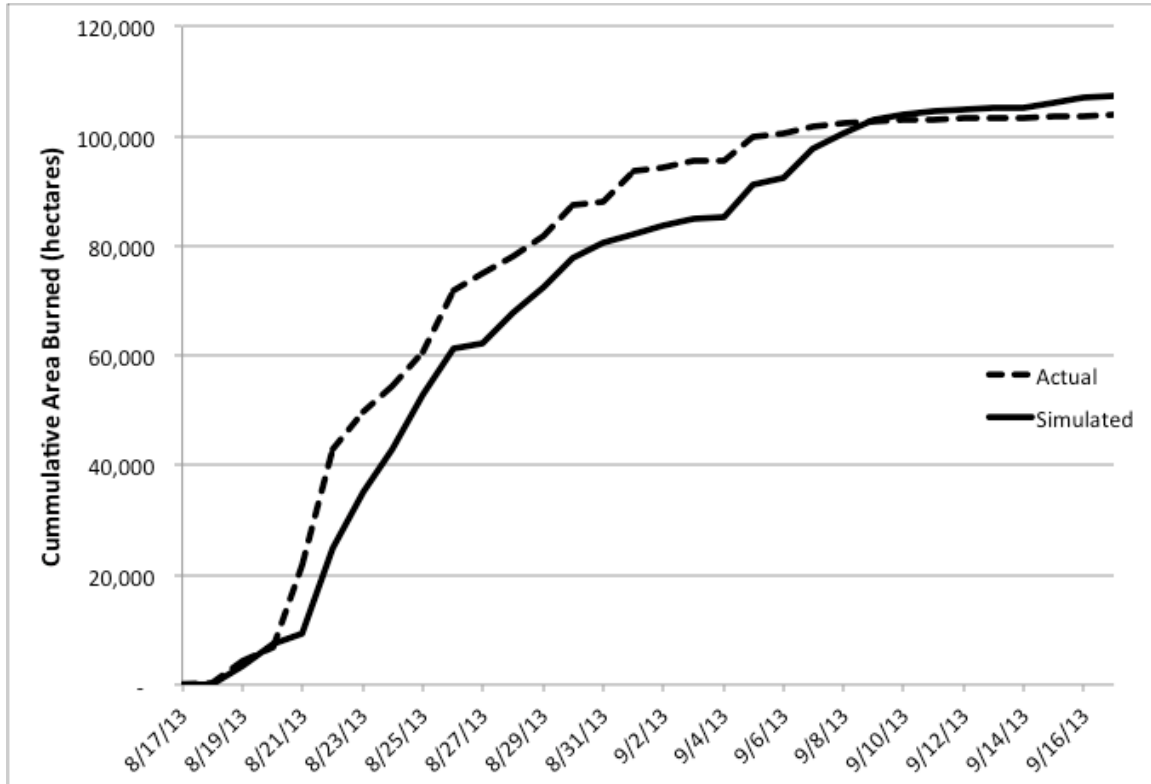

**Figure S3: 24-Hour PM<sub>2.5</sub> Concentrations with Air Quality Index (AQI) breakpoints for the most impacted monitoring site from each region**

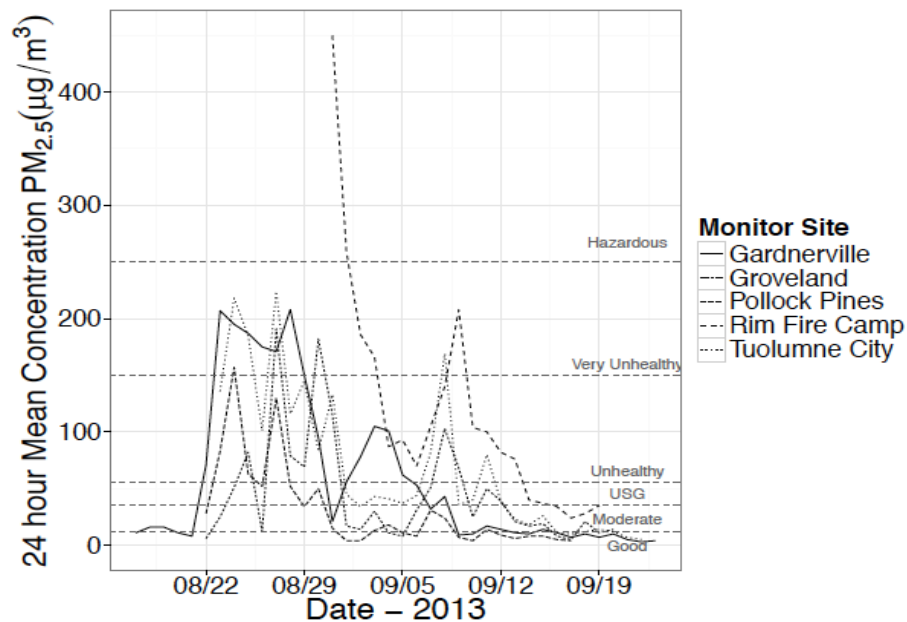

**Figure S4: Daily 24hr Mean PM<sub>2.5</sub> Concentrations measured by monitoring network compared to BlueSky estimates at 22 study monitor locations with Pearson Coefficients arranged by region and distance to Rim Fire.**

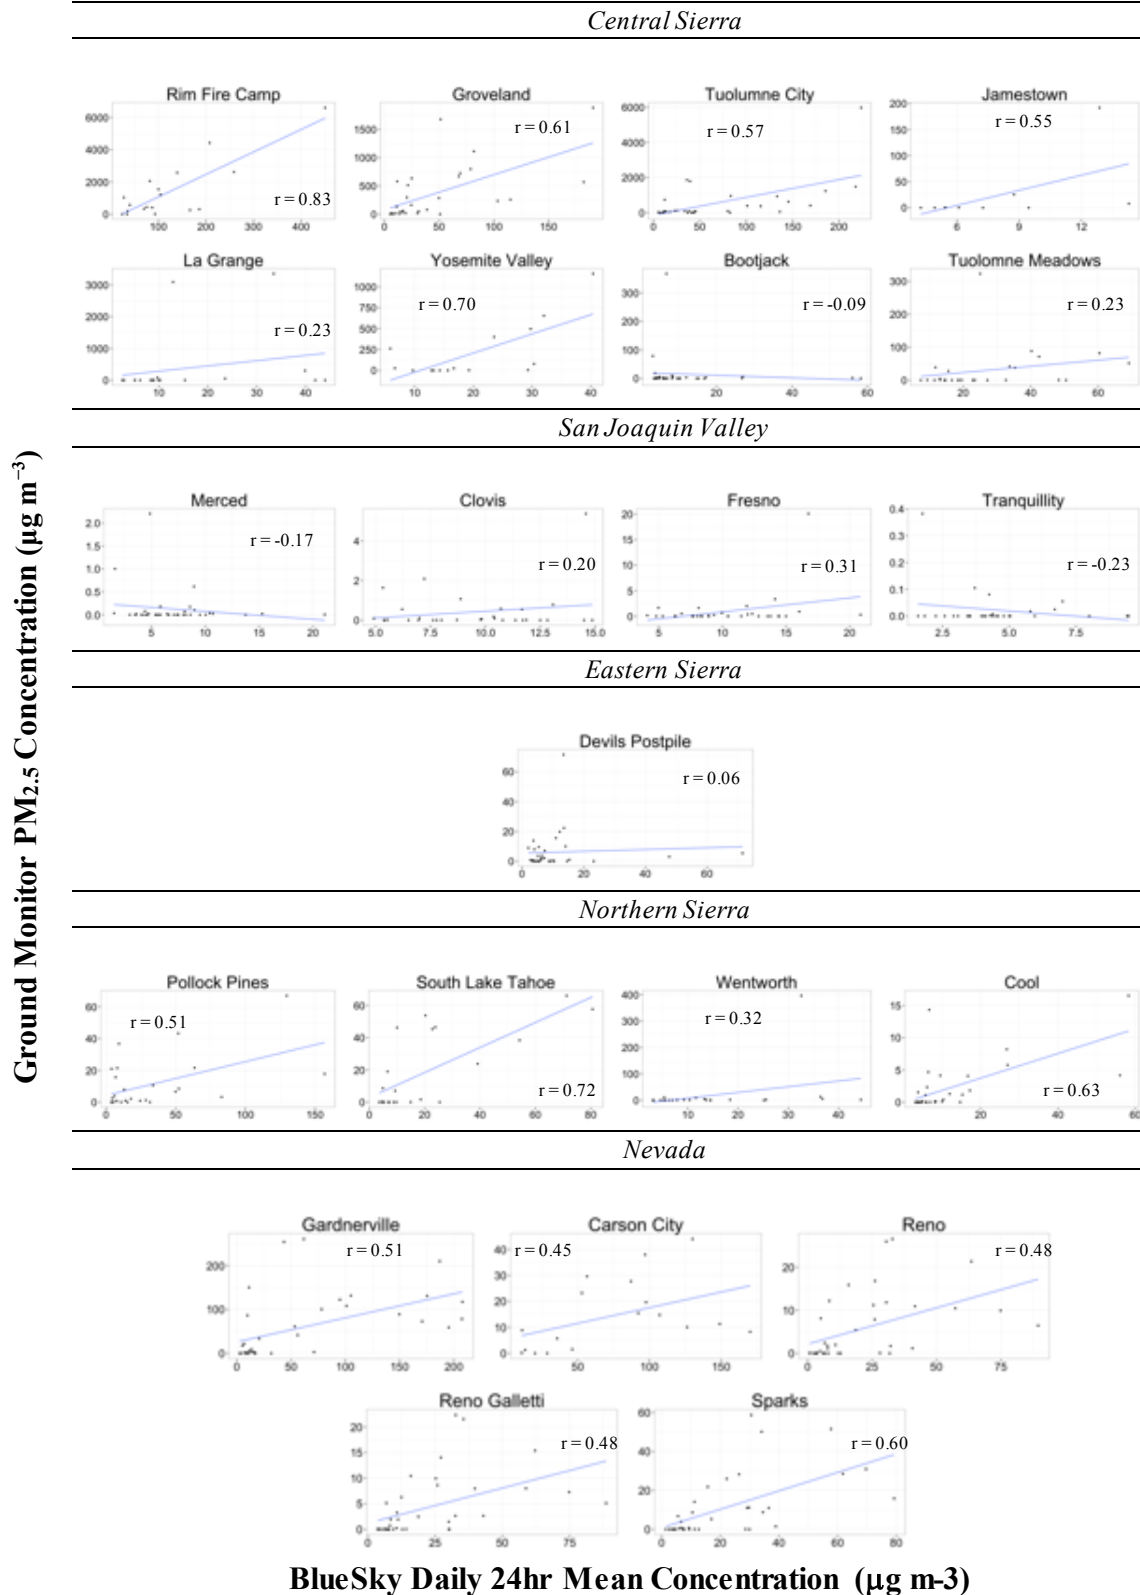

**Figure S5: Daily 24hr Mean PM<sub>2.5</sub> concentrations at San Joaquin Valley permanent PM<sub>2.5</sub> monitoring sites Pre-Rim Fire (July 17 – August 17, 2013), During Rim Fire (August 18 – October 24, 2013) and Post-Rim Fire (October 25 – November 25, 2013).**

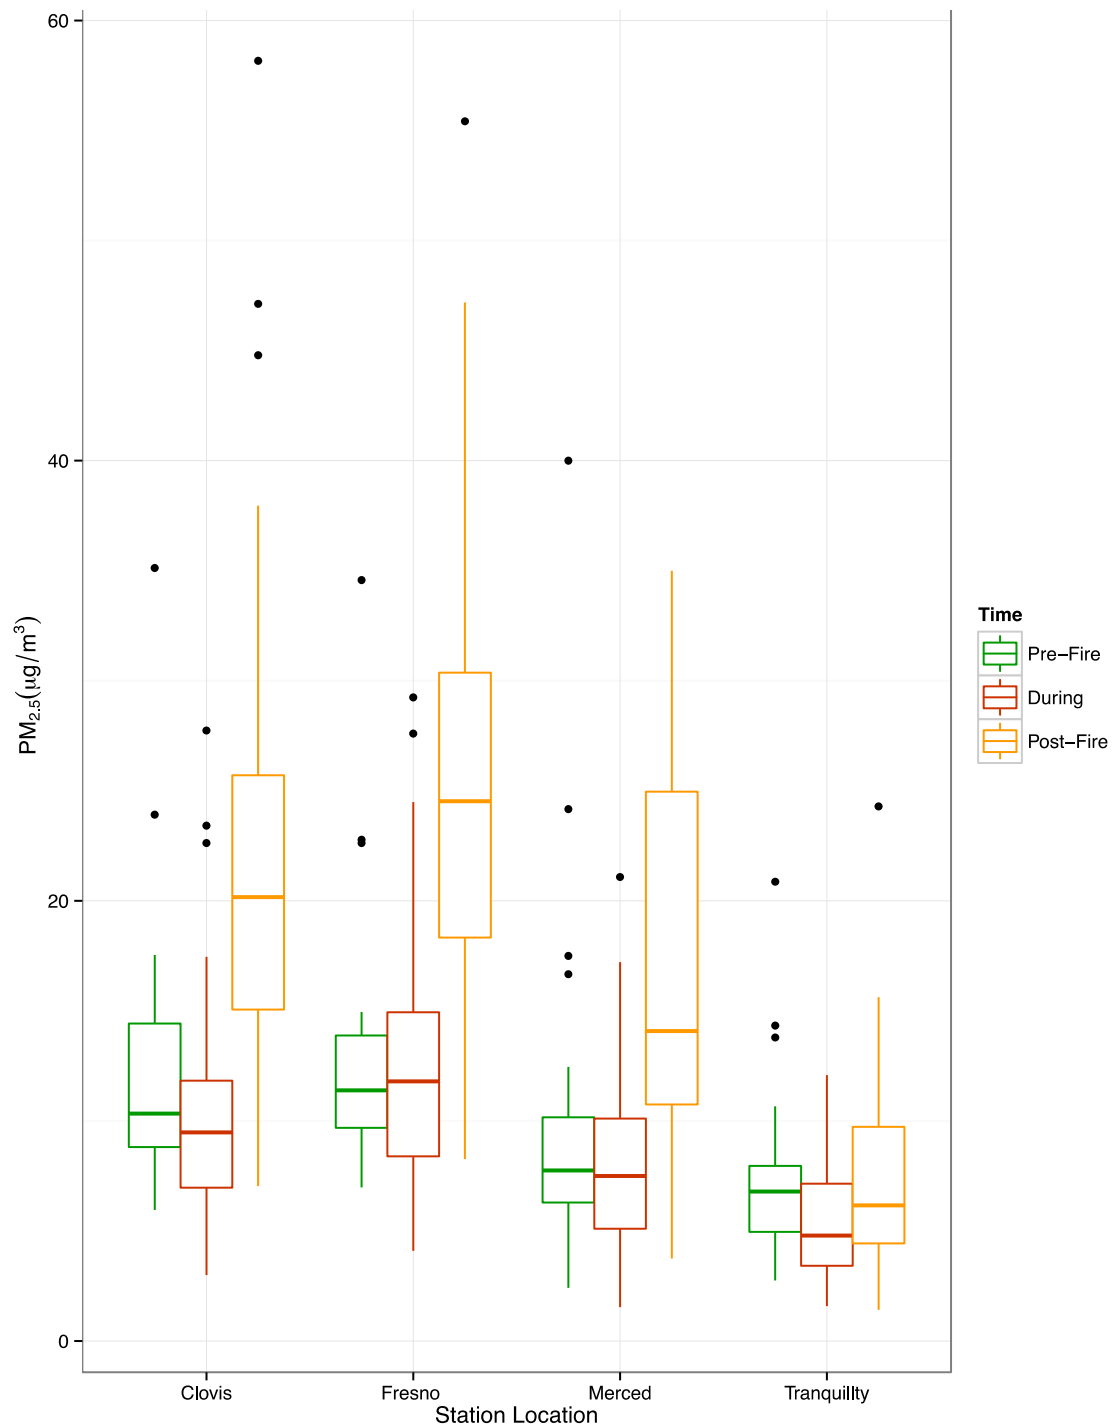

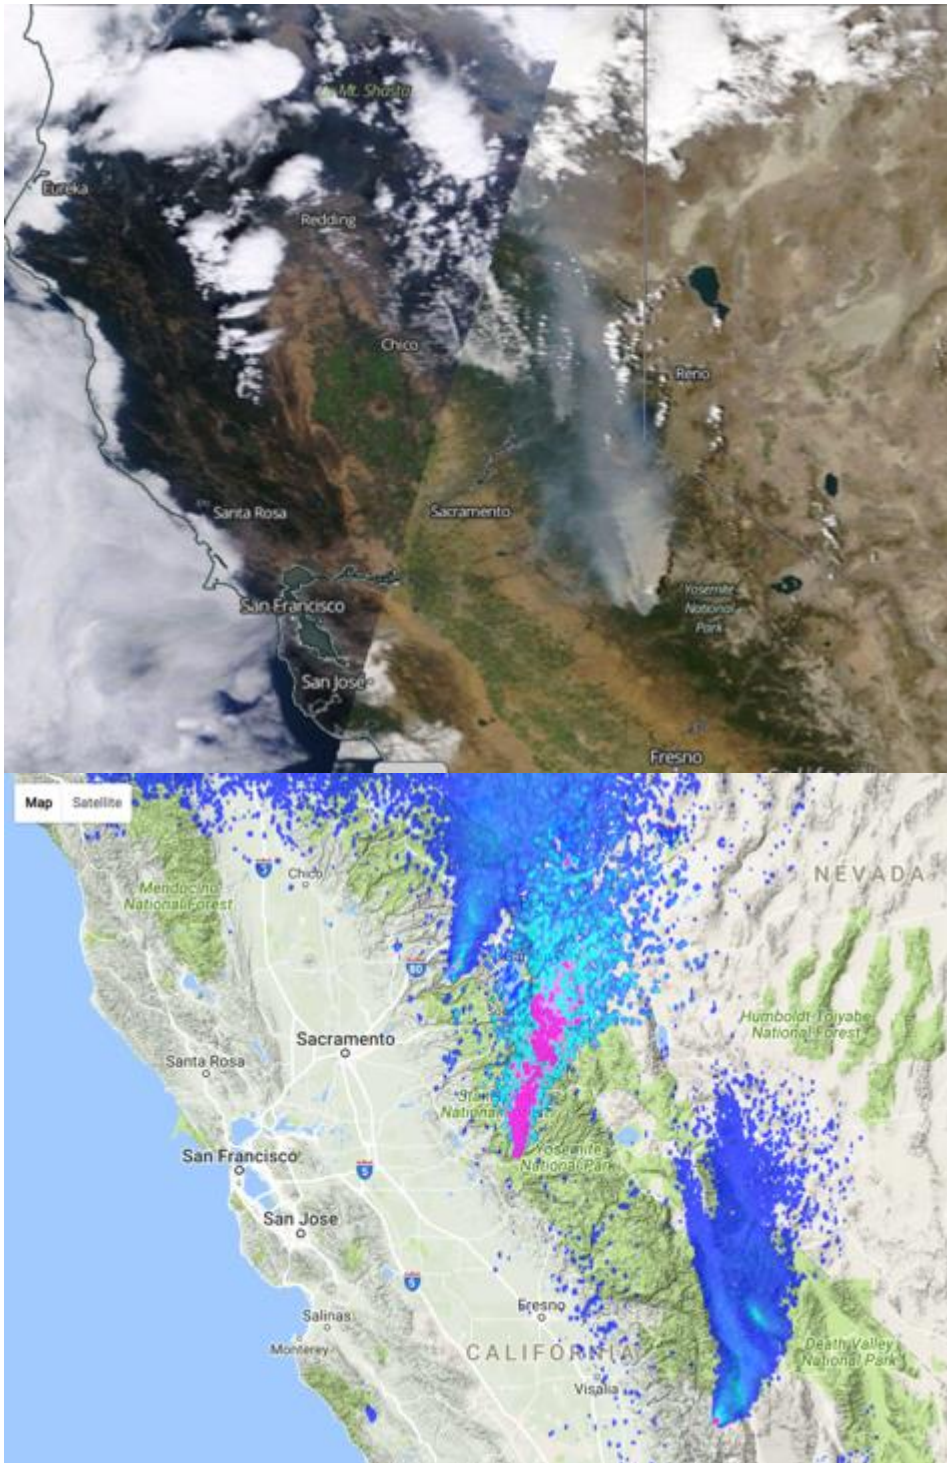

**Figure S6. (a) NASA Worldview visible satellite image of the Rim and American wildfires on 8/22/2013 and (b) BlueSky smoke model simulation of near-surface PM<sub>2.5</sub> concentrations from wildfires on 8/22/2013.**

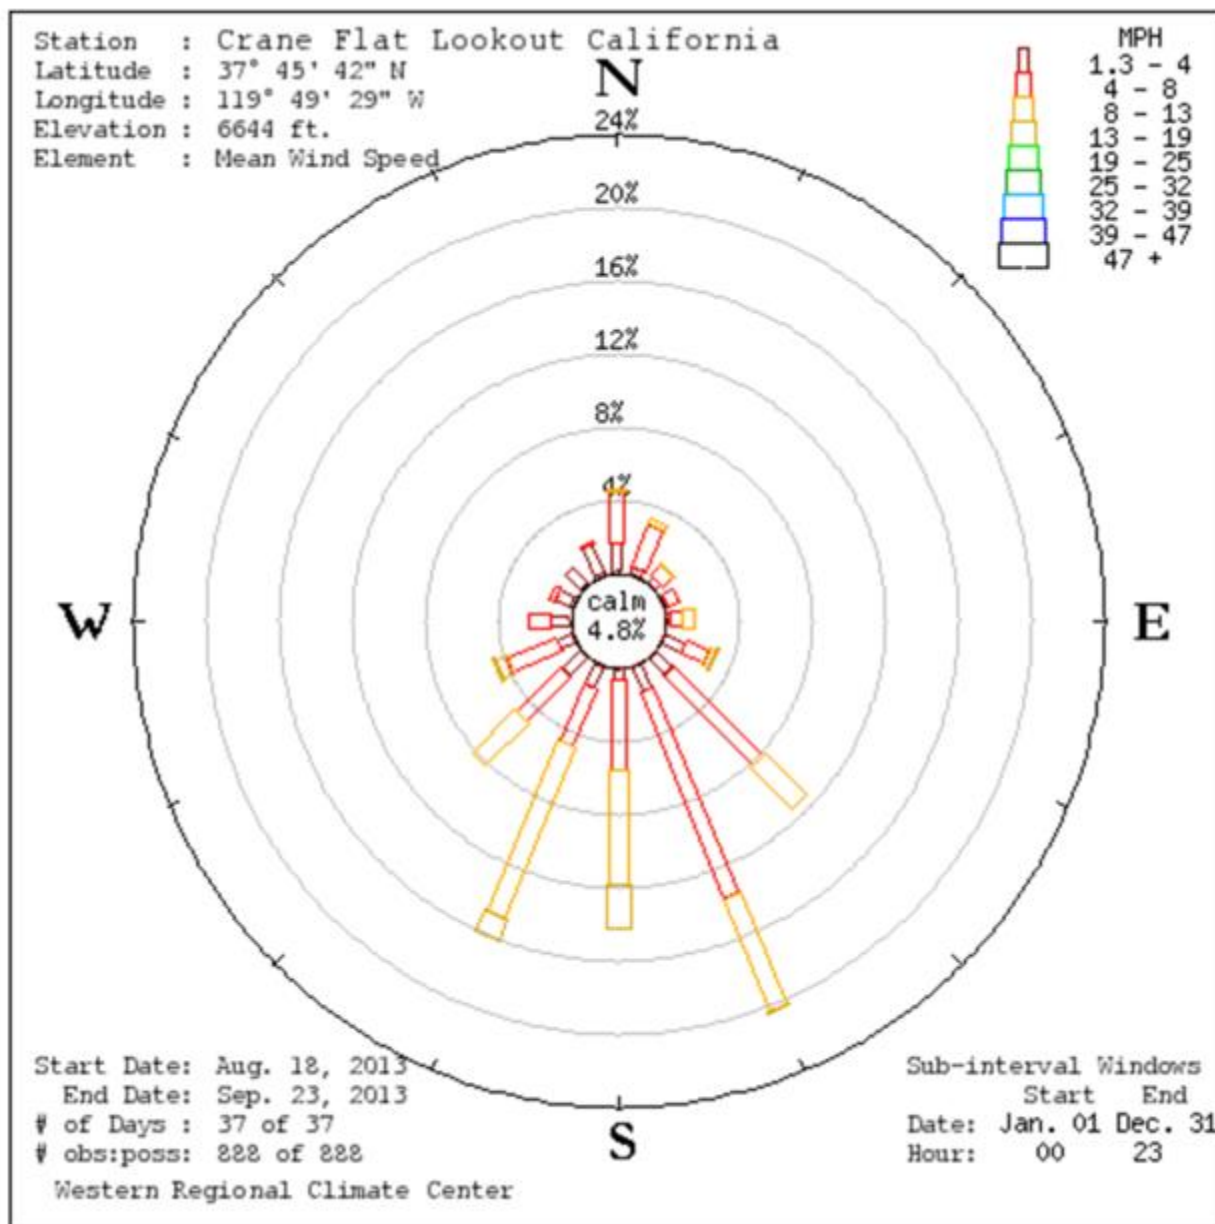

Figure S7. Wind rose of wind speed and direction for the Crane Flat Lookout remote automated weather station (RAWS) from August 18, 2013 to September 23, 2013. <http://www.raws.dri.edu/cgi-bin/rawMAIN.pl?caCCRA> (accessed 9/9/2016).
